# Supplementary material for: Head and neck cancer risk factors in the French West Indies
Source: Springer Nature journal article supplement (doi:10.1186/s12885-021-08787-4), 2021-09-30
Supplement: MOESM1 [file 19716156]

**Title:** Head and neck cancer risk factors in the French West Indies.

**Author list:**

- Aviane Auguste
- Clarisse Joachim
- Jacqueline Deloumeaux
- Stanie Gaete
- Leah Michineau
- Cécile Herrmann-Storck
- Suzy Duflo
- Danièle Luce

## Supporting information

Multivariate logistic regression analyses performed on occupational exposures, sensitivity analysis and hormonal factors in women

**S1 table:** Adjusted ORs for the individual occupations and sectors used to construct the occupational exposure variable.

| ISCO code                            | NAF code | Title                                                                    | Cases<br><i>n</i> | Controls<br><i>n</i> | OR <sup>†</sup> | 95% CI       |
|--------------------------------------|----------|--------------------------------------------------------------------------|-------------------|----------------------|-----------------|--------------|
| <b>At-risk occupational activity</b> |          |                                                                          | 56                | 87                   | 2.74            | (1.61-4.67)  |
| <b><i>ISCO</i> Occupation</b>        |          |                                                                          |                   |                      |                 |              |
| 53130                                | Any      | Cook, except private service                                             | 7                 | 8                    | 5.22            | (1.64-16.67) |
| 62210                                | 01.1F    | Banana plantation workers                                                | 9                 | 6                    | 3.89            | (0.96-15.74) |
| 95                                   | Any      | Bricklayers, Carpenters and Other Construction Workers                   | 35                | 58                   | 1.87            | (1.02-3.44)  |
| 99                                   | Any      | Labourer                                                                 | 14                | 22                   | 2.34            | (0.98-5.61)  |
| <b><i>NAF</i> Sector</b>             |          |                                                                          |                   |                      |                 |              |
| Any                                  | 28       | Manufacture of fabricated metal products, except machinery and equipment | 7                 | 6                    | 6.52            | (1.69-25.14) |

†: Adjusted for age, sex, region, the combination of cigarette smoking duration and intensity (cigarette/day), and daily alcohol drinking

**S2 table:** Adjusted odds ratios (OR), population attributable fractions (PAF) and 95% confidence intervals (CI) for HNSCC associated with tobacco, alcohol, family history of HNC, low BMI, Hr-HPV and at-risk occupations (observed data).

| Risk factor                          | Cases<br><i>n</i> | Controls<br><i>n</i> | OR <sup>†</sup> | 95% CI       | PAF   | 95% CI      |
|--------------------------------------|-------------------|----------------------|-----------------|--------------|-------|-------------|
| <b>Tobacco smoking</b>               |                   |                      |                 |              |       |             |
| Ever                                 | 65                | 107                  | 4.94            | (2.52-9.66)  | 62.5% | (41.3-76.0) |
| Never                                | 18                | 197                  |                 |              |       |             |
| <b>Daily alcohol</b>                 |                   |                      |                 |              |       |             |
| Ever                                 | 60                | 84                   | 4.29            | (2.28-8.07)  | 55.4% | (34.7-69.6) |
| Never                                | 23                | 220                  |                 |              |       |             |
| <b>Family history of HNC cancer</b>  |                   |                      |                 |              |       |             |
| Yes                                  | 8                 | 10                   | 4.29            | (1.30-14.17) | 7.4%  | (-3.2-16.9) |
| No                                   | 75                | 294                  |                 |              |       |             |
| <b>Body mass index</b>               |                   |                      |                 |              |       |             |
| BMI < 18.5                           | 11                | 7                    | 6.96            | (1.98-24.52) | 11.4% | (0.7-20.8)  |
| BMI ≥ 18.5                           | 72                | 297                  |                 |              |       |             |
| <b>Oral HPV Status</b>               |                   |                      |                 |              |       |             |
| Hr-HPV+                              | 19                | 30                   | 2.49            | (1.16-5.35)  | 13.7% | (-0.5-26.0) |
| Hr-HPV-                              | 64                | 274                  |                 |              |       |             |
| <b>At-risk occupational activity</b> |                   |                      |                 |              |       |             |
| Ever                                 | 34                | 68                   | 2.94            | (1.52-5.68)  | 27.0% | (9.7-41.0)  |
| Never                                | 49                | 236                  |                 |              |       |             |

French West Indies, 2013-2016

Analysis performed on 387 subjects (cases=83, controls=304). Subjects with missing data were removed from the analysis.

†: Adjusted for age, sex, region and all the risk factors in the table (ever tobacco, ever daily alcohol, Hr-HPV, low body mass index, family history of HNC and at-risk occupational activity)

**S3 table:** Population attributable fractions (PAF) and 95% confidence intervals (CI) of all risk factors combined for HNSCC, overall and by subgroups (observed data).

|                | Cases    | Controls | PAF   | 95% CI      |
|----------------|----------|----------|-------|-------------|
|                | <i>n</i> | <i>n</i> |       |             |
| HNSCC          | 83       | 304      | 90.1% | (81.1-94.8) |
| By subsite     |          |          |       |             |
| Oropharynx     | 37       | 304      | 90.2% | (74.7-96.2) |
| Non-oropharynx | 45       | 304      | 90.9% | (78.2-96.2) |
| By Sex         |          |          |       |             |
| Men            | 72       | 225      | 93.9% | (85.8-97.4) |
| Women          | 11       | 79       | 64.6% | (13.1-85.6) |
| By age         |          |          |       |             |
| <59            | 40       | 152      | 93.9% | (81.3-98.0) |
| ≥59            | 43       | 152      | 86.8% | (69.5-94.3) |

French West Indies, 2013-2016.

Analysis performed on 387 subjects (cases=83, controls=304). Subjects with missing data were removed from the analysis.

**S4 table:** Adjusted odds ratios (OR) and 95% confidence intervals (CI) for HNSCC associated with hormonal factors among women (observed data).

| Hormonal factor                                    | Case |        | Control |        | OR <sup>†</sup> | 95% CI        |
|----------------------------------------------------|------|--------|---------|--------|-----------------|---------------|
|                                                    | n    | col%   | n       | col%   |                 |               |
| <i>Exogenous factors</i>                           |      |        |         |        |                 |               |
| <b>Oral contraceptive use</b>                      |      |        |         |        |                 |               |
| Ever                                               | 9    | (64.3) | 83      | (84.7) | 1               | ref           |
| Never                                              | 5    | (35.7) | 15      | (15.3) | 2.27            | (0.60-8.64)   |
| Missing                                            | 4    |        | 1       |        |                 |               |
| <b>Hormone replacement therapy (HRT)</b>           |      |        |         |        |                 |               |
| Ever                                               | 1    | (7.7)  | 23      | (35.9) | 1               | ref           |
| Never                                              | 12   | (92.3) | 41      | (64.1) | 5.39            | (0.61-47.54)  |
| Missing                                            | 5    |        | 35      |        |                 |               |
| <i>Endogenous factors</i>                          |      |        |         |        |                 |               |
| <b>Age at Menarche</b>                             |      |        |         |        |                 |               |
| ≤ 13                                               | 5    | (35.7) | 67      | (68.4) | 1               | ref           |
| over 13                                            | 9    | (64.3) | 31      | (31.6) | 4.95            | (1.30-18.92)  |
| Missing                                            | 4    |        | 1       |        |                 |               |
| <b>Period of menstruation (binary)<sup>‡</sup></b> |      |        |         |        |                 |               |
| Begin after 13 and end ≤ 50 years old              | 8    | (61.5) | 12      | (20.3) | 26.49           | (3.69-189.93) |
| Other scenarios                                    | 5    | (37.8) | 47      | (79.7) | 1               | ref           |
| Missing                                            | 5    |        | 40      |        |                 |               |
| <b>Ever Pregnant</b>                               |      |        |         |        |                 |               |
| Yes                                                | 9    | (75.0) | 91      | (93.8) | 1               | ref           |
| No                                                 | 3    | (25.0) | 6       | (6.2)  | 5.92            | (0.88-39.88)  |
| Missing                                            | 6    |        | 2       |        |                 |               |
| <b>Parity</b>                                      |      |        |         |        |                 |               |
| No children                                        | 3    | (23.1) | 6       | (6.4)  | 8.23            | (0.96-70.50)  |
| 1 child                                            | 3    | (23.1) | 15      | (16.0) | 8.75            | (1.13-67.71)  |
| 2 children                                         | 3    | (23.1) | 28      | (29.8) | 1.53            | (0.26-8.99)   |
| > 2 children                                       | 4    | (30.8) | 45      | (47.9) | 1               | ref           |
| Missing                                            | 5    |        | 5       |        |                 |               |
| <b>Miscarriage</b>                                 |      |        |         |        |                 |               |
| Ever                                               | 2    | (16.7) | 38      | (41.3) | 1               | ref           |
| Never                                              | 10   | (83.3) | 54      | (58.7) | 3.94            | (0.68-22.84)  |
| Missing                                            | 6    |        | 7       |        |                 |               |

French West Indies, 2013-2016.

Analysis performed on observed data. Subjects with missing data were removed from the analysis.

†: Adjusted for age, sex, region, smoking status (current/former), daily alcohol drinking

‡: Age at first menarche and menopause - "shorter lifetime menstruation": Begin after 13 – end ≤ 50. "Other scenarios": aggregation of the following categories for ≤ 13 – end ≤ 50; after 13 – end after 50; ≤ 13 – end after 50.

**S5 table:** Adjusted odds ratios (OR) and 95% confidence intervals (CI) for HNSCC associated with hormonal factors among women (**Imputed data**).

| Hormonal factor                                    | Case |        | Control |        | OR <sup>†</sup> | 95% CI        |
|----------------------------------------------------|------|--------|---------|--------|-----------------|---------------|
|                                                    | n    | col%   | n       | col%   |                 |               |
| <i>Exogenous factors</i>                           |      |        |         |        |                 |               |
| <b>Oral contraceptive use</b>                      |      |        |         |        |                 |               |
| Ever                                               | 9    | (64.3) | 83      | (84.7) | 1               | ref           |
| Never                                              | 5    | (35.7) | 15      | (15.3) | 2.68            | (0.71-10.18)  |
| Missing                                            | 4    |        | 1       |        |                 |               |
| <b>Hormone replacement therapy (HRT)</b>           |      |        |         |        |                 |               |
| Ever                                               | 1    | (7.7)  | 23      | (35.9) | 1               | ref           |
| Never                                              | 12   | (92.3) | 41      | (64.1) | 3.66            | (0.55-24.56)  |
| Missing                                            | 5    |        | 35      |        |                 |               |
| <i>Endogenous factors</i>                          |      |        |         |        |                 |               |
| <b>Age at Menarche</b>                             |      |        |         |        |                 |               |
| ≤ 13                                               | 5    | (35.7) | 67      | (68.4) | 1               | ref           |
| over 13                                            | 9    | (64.3) | 31      | (31.6) | 4.79            | (1.26-18.27)  |
| Missing                                            | 4    |        | 1       |        |                 |               |
| <b>Period of menstruation (binary)<sup>‡</sup></b> |      |        |         |        |                 |               |
| Begin after 13 and end ≤ 50 years old              | 8    | (61.5) | 12      | (20.3) | 22.35           | (3.28-152.28) |
| Other scenarios                                    | 5    | (37.8) | 47      | (79.7) | 1               | ref           |
| Missing                                            | 5    |        | 40      |        |                 |               |
| <b>Ever Pregnant</b>                               |      |        |         |        |                 |               |
| Yes                                                | 9    | (75.0) | 91      | (93.8) | 1               | ref           |
| No                                                 | 3    | (25.0) | 6       | (6.2)  | 2.48            | (0.49-12.54)  |
| Missing                                            | 6    |        | 2       |        |                 |               |
| <b>Parity</b>                                      |      |        |         |        |                 |               |
| No children                                        | 3    | (23.1) | 6       | (6.4)  | 8.08            | (0.92-71.34)  |
| 1 child                                            | 3    | (23.1) | 15      | (16.0) | 6.28            | (0.87-45.61)  |
| 2 children                                         | 3    | (23.1) | 28      | (29.8) | 1.59            | (0.29-8.73)   |
| > 2 children                                       | 4    | (30.8) | 45      | (47.9) | 1               | ref           |
| Missing                                            | 5    |        | 5       |        |                 |               |
| <b>Miscarriage</b>                                 |      |        |         |        |                 |               |
| Ever                                               | 2    | (16.7) | 38      | (41.3) | 1               | ref           |
| Never                                              | 10   | (83.3) | 54      | (58.7) | 2.97            | (0.62-14.12)  |
| Missing                                            | 6    |        | 7       |        |                 |               |

French West Indies, 2013-2016.

Analysis performed on 117 women (18 cases and 99 controls).

†: Adjusted for age, sex, region, smoking status (current/former), daily alcohol drinking

‡: Age at first menarche and menopause - “shorter lifetime menstruation”: Begin after 13 – end ≤ 50. “Other scenarios”: aggregation of the following categories for ≤ 13 – end ≤ 50; after 13 – end after 50; ≤ 13 – end after 50.
